# Supplementary material
Source: ML conference proceedings conference paper supplement (https://proceedings.neurips.cc/paper_files/paper/2018/hash/e8fd4a8a5bab2b3785d794ab51fef55c-Abstract.html)
Supplement: Supplementary file [file e8fd4a8a5bab2b3785d794ab51fef55c-Supplemental.zip]

## Supplementary Material

### A Proof of Theorem 1 and Corollary 1

**Lemma 1.** Let  $A, B \in \mathbb{R}^{n \times n}$  be symmetric and positive semidefinite. Then,  $\langle A, B \rangle \geq 0$ .

*Proof.* We can write  $B$  as  $B = \sum_{i=1}^n \lambda_i u_i u_i^\top$ , where  $\lambda_i \geq 0$  for all  $i \in [n]$  and  $u_i^\top u_j = 0$  if  $i \neq j$ . Then,

$$\langle A, B \rangle = \text{trace} \{AB\} = \text{trace} \left\{ A \sum_{i=1}^n \lambda_i u_i u_i^\top \right\} = \sum_{i=1}^n \lambda_i u_i^\top A u_i \geq 0. \quad \blacksquare$$

**Lemma 2.** Let  $f : \mathbb{R}^{m \times n} \rightarrow \mathbb{R}^{m \times n}$  be a linear map defined as  $f(X) = \sum_{i=1}^L A_i X B_i$ , where  $A_i \in \mathbb{R}^{m \times m}$  and  $B_i \in \mathbb{R}^{n \times n}$  are symmetric positive semidefinite matrices for all  $i \in [L]$ . Then, for every nonzero  $u \in \mathbb{R}^m$  and  $v \in \mathbb{R}^n$ , the largest eigenvalue of  $f$  satisfies

$$\lambda_{\max}(f) \geq \frac{1}{\|u\|_2^2 \|v\|_2^2} \sum_{i=1}^L (u^\top A_i u)(v^\top B_i v).$$

*Proof.* First, we show that  $f$  is symmetric and positive semidefinite. Given two matrices  $X, Y \in \mathbb{R}^{m \times n}$ , we can write

$$\langle X, f(Y) \rangle = \text{trace} \left\{ \sum_i X^\top A_i Y B_i \right\} = \text{trace} \left\{ \sum_i B_i Y^\top A_i X \right\} = \langle Y, f(X) \rangle,$$

$$\langle X, f(X) \rangle = \text{trace} \left\{ \sum_i X^\top A_i X B_i \right\} = \sum_i \langle X^\top A_i X, B_i \rangle \geq 0,$$

where the last inequality follows from Lemma 1. This shows that  $f$  is symmetric and positive semidefinite. Then, for every nonzero  $X \in \mathbb{R}^{m \times n}$ , we have

$$\lambda_{\max}(f) \geq \frac{1}{\langle X, X \rangle} \langle X, f(X) \rangle.$$

In particular, given two nonzero vectors  $u \in \mathbb{R}^m$  and  $v \in \mathbb{R}^n$ ,

$$\lambda_{\max}(f) \geq \frac{1}{\langle uv^\top, uv^\top \rangle} \langle uv^\top, f(uv^\top) \rangle = \frac{1}{\|u\|_2^2 \|v\|_2^2} \sum_{i=1}^L (u^\top A_i u)(v^\top B_i v). \quad \blacksquare$$

**Proof of Theorem 1.** The cost function in Theorem 1 can be written as

$$\frac{1}{2} \text{trace} \{ (W_L \cdots W_1 - R)^\top (W_L \cdots W_1 - R) \}.$$

Let  $E$  denote the error in the estimate, i.e.  $E = W_L \cdots W_1 - R$ . The gradient descent yields

$$W_i[k+1] = W_i[k] - \delta W_{i+1}^\top[k] \cdots W_L^\top[k] E[k] W_1^\top[k] \cdots W_{i-1}^\top[k] \quad \forall i \in [L]. \quad (1)$$

By multiplying the update equations of  $W_i[k]$  and subtracting  $R$ , we can obtain the dynamics of  $E$  as

$$E[k+1] = E[k] - \delta \sum_{i=1}^L A_i[k] E[k] B_i[k] + o(E[k]), \quad (2)$$

where  $o(\cdot)$  denotes the higher order terms, and

$$A_i = W_L W_{L-1} \cdots W_{i+1} W_{i+1}^\top \cdots W_{L-1}^\top W_L^\top \quad \forall i \in [L],$$

$$B_i = W_1^\top W_2^\top \cdots W_{i-1}^\top W_{i-1} \cdots W_2 W_1 \quad \forall i \in [L].$$

Lyapunov's indirect method of stability (Khalil, 2002; Sastry, 1999) states that given a dynamical system  $x[k+1] = F(x[k])$ , its equilibrium  $x^*$  is stable in the sense of Lyapunov only if the linearization of the system around  $x^*$

$$(x[k+1] - x^*) = (x[k] - x^*) + \left. \frac{\partial F}{\partial x} \right|_{x=x^*} (x[k] - x^*)$$

does not have any eigenvalue larger than 1 in magnitude. By using this fact for the system defined by (1)-(2), we can observe that an equilibrium  $\{W_j^*\}_{j \in [L]}$  with  $W_L^* \cdots W_1^* = \hat{R}$  is stable in the sense of Lyapunov only if the system

$$(E[k+1] - \hat{R} + R) = (E[k] - \hat{R} + R) - \delta \sum_{i=1}^L A_i \Big|_{\{W_j^*\}} (E[k] - \hat{R} + R) B_i \Big|_{\{W_j^*\}}$$

does not have any eigenvalue larger than 1 in magnitude, which requires that the mapping

$$f(\tilde{E}) = \sum_{i=1}^L A_i \Big|_{\{W_j^*\}} \tilde{E} B_i \Big|_{\{W_j^*\}} \quad (3)$$

does not have any real eigenvalue larger than  $(2/\delta)$ . Let  $u$  and  $v$  be the left and right singular vectors of  $\hat{R}$  corresponding to its largest singular value, and let  $p_j$  and  $q_j$  be defined as in the statement of Theorem 1. Then, by Lemma 2, the mapping  $f$  in (3) does not have an eigenvalue larger than  $(2/\delta)$  only if

$$\sum_{i=1}^L p_{i-1}^2 q_{i+1}^2 \leq \frac{2}{\delta},$$

which completes the proof. ■

**Proof of Corollary 1.** Note that

$$q_{i+1} p_i = \|u^\top W_L W_{L-1} \cdots W_{i+1}\|_2 \|W_i \cdots W_2 W_1 v\|_2 \geq \|u^\top W_L \cdots W_1 v\|_2 = \rho(R).$$

As long as  $\rho(R) \neq 0$ , we have  $p_i \neq 0$  for all  $i \in [L]$ , and therefore,

$$p_{i-1}^2 q_{i+1}^2 \geq \frac{p_{i-1}^2}{p_i^2} \rho(R)^2. \quad (4)$$

Using inequality (4), the bound in Theorem 1 can be relaxed as

$$\delta \leq 2 \left( \sum_{i=1}^L \frac{p_{i-1}^2}{p_i^2} \rho(R)^2 \right)^{-1}. \quad (5)$$

Since  $\prod_{i=1}^L (p_i/p_{i-1}) = \rho(R) \neq 0$ , we also have the inequality

$$\sum_{i=1}^L \frac{p_{i-1}^2}{p_i^2} \rho(R)^2 \geq \sum_{i=1}^L \frac{\rho(R)^2}{(\rho(R)^{1/L})^2} = L \rho(R)^{2(L-1)/L},$$

and the bound in (5) can be simplified as

$$\delta \leq \frac{2}{L \rho(R)^{2(L-1)/L}}. \quad \blacksquare$$

## B Proof of Theorem 2

**Lemma 3.** Let  $\lambda > 0$  be estimated as a multiplication of the scalar parameters  $\{w_i\}_{i \in [L]}$  by minimizing  $\frac{1}{2}(w_L \cdots w_2 w_1 - \lambda)^2$  via gradient descent. Assume that  $w_i[0] = 1$  for all  $i \in [L]$ . If the step size  $\delta$  is chosen to be less than or equal to

$$\delta_c = \begin{cases} L^{-1} \lambda^{-2(L-1)/L} & \text{if } \lambda \in [1, \infty), \\ (1 - \lambda)^{-1} (1 - \lambda^{1/L}) & \text{if } \lambda \in (0, 1), \end{cases}$$

then  $|w_i[k] - \lambda^{\frac{1}{L}}| \leq \beta(\delta)^k |1 - \lambda^{\frac{1}{L}}|$  for all  $i \in [L]$ , where

$$\beta(\delta) = \begin{cases} 1 - \delta(\lambda - 1)(\lambda^{1/L} - 1)^{-1} & \text{if } \lambda \in (1, \infty), \\ 1 - \delta L \lambda^{2(L-1)/L} & \text{if } \lambda \in (0, 1]. \end{cases}$$

*Proof.* Due to symmetry,  $w_i[k] = w_j[k]$  for all  $k \in \mathbb{N}$  for all  $i, j \in [L]$ . Denoting any of them by  $w[k]$ , we have

$$w[k+1] = w[k] - \delta w^{L-1}[k] (w^L[k] - \lambda).$$

To show that  $w[k]$  converges to  $\lambda^{1/L}$ , we can write

$$w[k+1] - \lambda^{1/L} = \mu(w[k])(w[k] - \lambda^{1/L}),$$

where

$$\mu(w) = 1 - \delta w^{L-1} \sum_{j=0}^{L-1} w^j \lambda^{(L-1-j)/L}.$$

If there exists some  $\beta \in [0, 1)$  such that

$$0 \leq \mu(w[k]) \leq \beta \text{ for all } k \in \mathbb{N}, \quad (6)$$

then  $w[k]$  is always larger or always smaller than  $\lambda^{1/L}$ , and its distance to  $\lambda^{1/L}$  decreases by a factor of  $\beta$  at each step. Since  $\mu(w)$  is a monotonic function in  $w$ , the condition (6) holds for all  $k$  if it holds only for  $w[0] = 1$  and  $\lambda^{1/L}$ , which gives us  $\delta_c$  and  $\beta(\delta)$ . ■

**Proof of Theorem 2.** There exists a common invertible matrix  $U \in \mathbb{R}^{n \times n}$  that can diagonalize all the matrices in the system created by the gradient descent:  $R = U \Lambda_R U^\top$ ,  $W_i = U \Lambda_{W_i} U^\top$  for all  $i \in [L]$ . Then the dynamical system turns into  $n$  independent update rules for the diagonal elements of  $\Lambda_R$  and  $\{\Lambda_{W_i}\}_{i \in [L]}$ . Lemma 3 can be applied to each of the  $n$  systems involving the diagonal elements. Since  $\delta_c$  in Lemma 3 is monotonically decreasing in  $\lambda$ , the bound for the maximum eigenvalue of  $R$  guarantees linear convergence. ■

## C Proof of Theorem 3

**Lemma 4.** Assume that  $\lambda < 0$  and  $w_i[0] = 1$  is used for all  $i \in [L]$  to initialize the gradient descent algorithm to solve

$$\min_{(w_1, \dots, w_L) \in \mathbb{R}^L} \frac{1}{2} (w_L \dots w_2 w_1 - \lambda)^2.$$

Then, each  $w_i$  converges to 0 unless  $\delta > (1 - \lambda)^{-1}$ .

*Proof.* We can write the update rule for any weight  $w_i$  as

$$w[k+1] = w[k] (1 - \delta \sigma w^{L-2}[k] (w^L[k] - \lambda))$$

which has one equilibrium at  $w^* = \lambda^{1/L}$  and another at  $w^* = 0$ . If  $0 < \delta \leq 1/\sigma(1 - \lambda)$  and  $w[0] = 1$ , it can be shown by induction that

$$0 \leq 1 - \delta \sigma w^{L-2}[k] (w^L[k] - \lambda) < 1$$

for all  $k \geq 0$ . As a result,  $w[k]$  converges to 0. ■

**Proof of Theorem 3.** Similar to the proof of Theorem 2, the system created by the gradient descent can be decomposed into  $n$  independent systems of the diagonal elements of the matrices  $\Lambda_R$  and  $\{\Lambda_{W_i}\}_{i \in [L]}$ . Then, Lemma 3 and Lemma 4 can be applied to the systems with positive and negative eigenvalues of  $R$ , respectively. ■

## D Proof of Theorem 4

To find a necessary condition for the convergence of the gradient descent algorithm to  $(\hat{W}, \hat{V})$ , we analyze the local stability of that solution in the sense of Lyapunov. Since the analysis is local and the function  $g$  is fixed, for each point  $x_i$  we can use a matrix  $G_i$  that satisfies  $G_i(\hat{V}x_i - b) = g(\hat{V}x_i - b)$ . Note that  $G_i$  is a diagonal matrix and all of its diagonal elements are either 0 or 1. Then, we can write the cost function around an equilibrium as

$$\frac{1}{2} \sum_{i=1}^N \text{trace} \left\{ [W G_i (V x_i - b) - f(x_i)]^\top [W G_i (V x_i - b) - f(x_i)] \right\}.$$

Denoting the error  $W G_i (V x_i - b) - f(x_i)$  by  $e_i$ , the gradient descent gives

$$W[k+1] = W[k] - \delta \sum_{i=1}^N e_i[k] (V[k] x_i - b)^\top G_i^T,$$

$$V[k+1] = V[k] - \delta \sum_{i=1}^N G_i^\top W[k]^\top e_i[k] x_i^\top.$$

Let  $e$  denote the vector  $(e_1^\top \dots e_N^\top)^\top$ . Then we can write the update equation of  $e_j$  as

$$\begin{aligned} e_j[k+1] &= e_j[k] - \delta W[k] G_j \sum_i G_i^\top W[k]^\top e_i[k] x_i^\top x_j \\ &\quad - \delta \sum_i e_i[k] (V[k] x_i - b)^\top G_i^\top G_j (V[k] x_j - b) + o(e[k]). \end{aligned}$$

Similar to the proof of Theorem 1, the equilibrium  $(\hat{W}, \hat{V})$  can be stable in the sense on Lyapunov only if the system

$$e_j[k+1] = e_j[k] - \delta \sum_i \hat{W} G_j G_i^\top \hat{W}^\top e_i[k] x_i^\top x_j - \delta \sum_i e_i[k] (\hat{V} x_i - b)^\top G_i^\top G_j (\hat{V} x_j - b) \quad (7)$$

does not have any eigenvalue larger than 1 in magnitude. Note that the linear system in (7) can be described by a symmetric matrix, whose eigenvalues cannot be larger in magnitude than the eigenvalues of its sub-blocks on the diagonal, in particular those of the system

$$e_j[k+1] = e_j[k] - \delta \hat{W} G_j G_j^\top \hat{W}^\top e_j[k] x_j^\top x_j - \delta e_j[k] (\hat{V} x_j - b)^\top G_j^\top G_j (\hat{V} x_j - b). \quad (8)$$

The eigenvalues of the system (8) are less than 1 in magnitude only if the eigenvalues of the system

$$h(u) = \hat{W} G_j G_j^\top \hat{W}^\top u x_j^\top x_j + u (\hat{V} x_j - b)^\top G_j^\top G_j (\hat{V} x_j - b)$$

are less than  $(2/\delta)$ . This requires that for all  $j \in [N]$  for which  $\hat{f}(x_j) \neq 0$ ,

$$\begin{aligned} \frac{2}{\delta} &\geq \frac{\langle \hat{f}(x_j), h(\hat{f}(x_j)) \rangle}{\langle \hat{f}(x_j), \hat{f}(x_j) \rangle} \\ &= \frac{1}{\|\hat{f}(x_j)\|^2} \left( \|G_j^\top \hat{W}^\top \hat{f}(x_j)\|^2 \|x_j\|^2 + \|\hat{f}(x_j)\|^2 \|G_j(\hat{V} x_j - b)\|^2 \right) \\ &\geq \frac{1}{\|\hat{f}(x_j)\|^2} \frac{\|(\hat{V} x_j - b)^\top G_j^\top G_j^\top \hat{W}^\top \hat{f}(x_j)\|^2}{\|(\hat{V} x_j - b)^\top G_j^\top\|^2} \|x_j\|^2 + \|G_j(\hat{V} x_j - b)\|^2 \\ &= \frac{1}{\|G_j(\hat{V} x_j - b)\|^2} \|\hat{f}(x_j)\|^2 \|x_j\|^2 + \|G_j(\hat{V} x_j - b)\|^2 \\ &\geq 2\|\hat{f}(x_j)\| \|x_j\|. \end{aligned}$$

As a result, Lyapunov stability of the solution  $(\hat{W}, \hat{V})$  requires

$$\frac{1}{\delta} \geq \max_i \|\hat{f}(x_i)\| \|x_i\|. \quad \blacksquare$$
